# Supplementary material for: Trimodal distribution of arylamine N-acetyltransferase 1 mRNA in breast cancer tumors: association with overall survival and drug resistance
Source: PubMed Central journal article supplement (PMC6029418; doi:10.1186/s12864-018-4894-4), 2018-07-03
Supplement: 12864_2018_4894_MOESM2_ESM.pdf [file 12864_2018_4894_MOESM2_ESM.pdf]

Table S1 - List of genes that correlate with NAT1 expression in the METABRIC database. +/- depicts whether correlation is positive or negative

| Low NAT1  |           |     | High NAT1    |           |     | Intermediate NAT1 |           |     |
|-----------|-----------|-----|--------------|-----------|-----|-------------------|-----------|-----|
| Gene      | p         | +/- | Gene         | p         | +/- | Gene              | p         | +/- |
| TMBIM4    | 3.991E-21 | +   | SEMG1        | 5.263E-88 | +   | PSD3              | 2.996E-08 | +   |
| PAPD4     | 4.238E-21 | +   | PSD3         | 1.762E-26 | +   |                   |           |     |
| RALB      | 2.903E-20 | +   | SOX14        | 2.25E-18  | +   |                   |           |     |
| TCF20     | 6.277E-20 | -   | CNOT7        | 3.117E-18 | +   |                   |           |     |
| CCNDBP1   | 6.66E-19  | +   | TMEM66       | 5.016E-18 | +   |                   |           |     |
| ATP6V0E1  | 1.833E-18 | +   | PCM1         | 6.223E-18 | +   |                   |           |     |
| SNRPA     | 6.169E-18 | -   | FBXO16       | 3.461E-17 | +   |                   |           |     |
| LIMA1     | 1.269E-17 | +   | MTUS1        | 3.345E-16 | +   |                   |           |     |
| RPS27L    | 3.177E-17 | +   | DCTN6        | 2.544E-15 | +   |                   |           |     |
| DAZAP2    | 9.187E-17 | +   | ZBTB41       | 3.563E-15 | +   |                   |           |     |
| ATN1      | 1.057E-16 | -   | BNIP3L       | 5.207E-15 | +   |                   |           |     |
| RPL36AL   | 1.422E-16 | +   | C6orf97      | 8.009E-15 | +   |                   |           |     |
| ANKMY2    | 2.445E-16 | +   | MRPS14       | 4.073E-14 | +   |                   |           |     |
| COMMD10   | 2.905E-16 | +   | ASAH1        | 7.223E-14 | +   |                   |           |     |
| ELF1      | 3.703E-16 | +   | DYNC2LI1     | 2.563E-13 | +   |                   |           |     |
| EIF2C2    | 4.067E-16 | -   | AGR3         | 3.398E-13 | +   |                   |           |     |
| LRFN4     | 5.391E-16 | -   | LOC100506668 | 3.73E-13  | +   |                   |           |     |
| AFF1      | 7.121E-16 | +   | CRH          | 1.414E-12 | +   |                   |           |     |
| JKAMP     | 8.4E-16   | +   | PRDX3        | 2.33E-12  | +   |                   |           |     |
| MFAP1     | 9.702E-16 | +   | PHOSPHO2     | 2.536E-12 | +   |                   |           |     |
| FNIP1     | 1.333E-15 | +   | SRP9         | 3.733E-12 | +   |                   |           |     |
| FBXL5     | 1.878E-15 | +   | ALG13        | 5.212E-12 | +   |                   |           |     |
| ARPC3     | 2.628E-15 | +   | BCLAF1       | 6.557E-12 | +   |                   |           |     |
| ZNF462    | 2.667E-15 | -   | LOC729852    | 6.636E-12 | +   |                   |           |     |
| GOLGA5    | 3.692E-15 | +   | XPO7         | 9.913E-12 | +   |                   |           |     |
| XBP1      | 4.062E-15 | +   | TNKS         | 1.044E-11 | +   |                   |           |     |
| HNMT      | 4.253E-15 | +   | CD46         | 1.068E-11 | +   |                   |           |     |
| C14orf129 | 4.352E-15 | +   | IKZF5        | 1.748E-11 | +   |                   |           |     |
| SNX2      | 6.463E-15 | +   | ALG14        | 1.759E-11 | +   |                   |           |     |
| SH3BGRL   | 7.091E-15 | +   | DMD          | 2.176E-11 | +   |                   |           |     |
| PQLC3     | 9.642E-15 | +   | ERI2         | 2.265E-11 | +   |                   |           |     |
| ATXN7L2   | 1.256E-14 | -   | FBXO3        | 2.335E-11 | +   |                   |           |     |
| BF509118  | 1.312E-14 | -   | SRR          | 3.831E-11 | +   |                   |           |     |
| AK124143  | 1.614E-14 | +   | PRPF31       | 4.951E-11 | -   |                   |           |     |
| RGMA      | 1.615E-14 | -   | CLASP2       | 6.651E-11 | +   |                   |           |     |
| TBC1D22B  | 1.714E-14 | -   | ZG16B        | 6.816E-11 | +   |                   |           |     |
| LACTB     | 1.749E-14 | +   | GIN1         | 6.877E-11 | +   |                   |           |     |
| SAR1B     | 1.807E-14 | +   | EPHX2        | 6.966E-11 | +   |                   |           |     |
| MICALL1   | 1.833     |     |              |           |     |                   |           |     |

|         |           |   |          |           |   |
|---------|-----------|---|----------|-----------|---|
| GALNT10 | 2.518E-14 | + | ACAT1    | 8.36E-11  | + |
| SMO     | 4.288E-14 | - | TMCO1    | 1.36E-10  | + |
| AHDC1   | 4.966E-14 | - | GNG12    | 1.515E-10 | + |
| CAB39   | 5.284E-14 | + | IQCK     | 1.556E-10 | + |
| MGST2   | 5.783E-14 | + | CTSA     | 1.81E-10  | - |
| URB2    | 6.137E-14 | - | CCDC126  | 2.164E-10 | + |
| TIMM44  | 8.845E-14 | - | CASC1    | 2.228E-10 | + |
| C4orf34 | 9.561E-14 | + | GTF2H5   | 3.404E-10 | + |
| VPS29   | 1.106E-13 | + | ZNF627   | 6.472E-10 | + |
| CDK18   | 1.148E-13 | - | SLC10A3  | 7.198E-10 | - |
| ACTR10  | 1.223E-13 | + | ST8SIA6  | 7.773E-10 | + |
| FOXC1   | 1.297E-13 | - | IFT46    | 7.903E-10 | + |
| GPR137B | 1.724E-13 | + | SYPL1    | 8.519E-10 | + |
| SETD1A  | 1.788E-13 | - | RSBN1L   | 8.572E-10 | + |
| PELP1   | 2.203E-13 | - | ENSA     | 9.145E-10 | + |
| RBL2    | 2.328E-13 | + | AGPAT5   | 9.606E-10 | + |
| AP3B1   | 2.652E-13 | + | APITD1   | 1.025E-09 | + |
| COPS4   | 2.773E-13 | + | C9orf116 | 1.066E-09 | + |
| SNAP23  | 2.997E-13 | + | C14orf45 | 1.152E-09 | + |
| GPR125  | 3.079E-13 | - | FOXA1    | 1.172E-09 | + |
| STRN3   | 3.186E-13 | + | CLUAP1   | 1.242E-09 | + |
| NARF    | 3.391E-13 | - | CDK14    | 1.286E-09 | + |
| YPEL5   | 3.444E-13 | + | STXBP3   | 1.577E-09 | + |
| PIF1    | 3.526E-13 | - | LYPLAL1  | 1.591E-09 | + |
| RAB40B  | 3.671E-13 | - | ZNF429   | 1.807E-09 | + |
| ETFA    | 3.789E-13 | + | MRPL22   | 1.981E-09 | + |
| GIN1    | 4.304E-13 | + | SLC25A1  | 1.987E-09 | - |
| IL6ST   | 4.52E-13  | + | C10orf57 | 2.021E-09 | + |
| TCF7L1  | 4.626E-13 | - | FBXO4    | 2.274E-09 | + |
| BCL11A  | 4.704E-13 | - | UBA3     | 2.6E-09   | + |
| HEXB    | 4.733E-13 | + | NKIRAS2  | 2.607E-09 | - |
| EHMT2   | 5.096E-13 | - | C6orf130 | 2.904E-09 | + |
| ALKBH1  | 5.144E-13 | + | DDX39A   | 2.988E-09 | - |
| RB1     | 5.164E-13 | + | EXOSC1   | 3.149E-09 | + |
| MR1     | 5.581E-13 | + | ZNF239   | 3.79E-09  | + |
| ANG     | 5.596E-13 | + | TRMT1L   | 3.813E-09 | + |
| ZCCHC9  | 6.15E-13  | + | PIP5K1A  | 4.3E-09   | + |
| JMJD4   | 6.298E-13 | - | FAM125B  | 4.461E-09 | - |
| MCMBP   | 6.702E-13 | - | RPAP3    | 4.758E-09 | + |
| SLC35F5 | 7.601E-13 | + | PTPN7    | 4.845E-09 | - |
| ALKBH2  | 7.687E-13 | - | TMF1     | 5.296E-09 | + |
| SEPP1   | 7.701E-13 | + | CR614803 | 5.337E-09 | + |
| KLHDC3  | 8.563E-13 | - | LIME1    | 5.514E-09 | - |
| LIPA    | 8.748E-13 | + | COMMD10  | 5.598E-09 | + |
| TGFBR2  | 8.971E-13 | + | NOTCH2NL | 5.786E-09 | + |
| CSNK1E  | 9.039E-13 | - | IFNAR2   | 5.918E-09 | - |

|          |           |   |                |           |   |
|----------|-----------|---|----------------|-----------|---|
| SPPL2A   | 1.223E-12 | + | ATG9A          | 6.032E-09 | - |
| ZNF618   | 1.23E-12  | - | SEH1L          | 6.172E-09 | + |
| ATP6VOD1 | 1.281E-12 | + | THAP1          | 6.685E-09 | + |
| SRP54    | 1.292E-12 | + | ACTN4          | 7.633E-09 | - |
| MORC2    | 1.405E-12 | - | CYB5A          | 7.868E-09 | + |
| MREG     | 1.424E-12 | + | DYRK2          | 8.022E-09 | - |
| HSD17B11 | 1.449E-12 | + | PLEKHA3        | 8.038E-09 | + |
| HERPUD1  | 1.573E-12 | + | SPATA17        | 8.093E-09 | + |
| CGRRF1   | 1.591E-12 | + | CD2AP          | 8.107E-09 | + |
| SERPINB1 | 1.665E-12 | + | ELF1           | 8.62E-09  | + |
| LUM      | 1.669E-12 | + | MGAT1          | 9.186E-09 | - |
| SLC36A4  | 1.754E-12 | - | YEATS2         | 9.336E-09 | - |
| CASC4    | 1.76E-12  | + | PDE6B          | 9.422E-09 | + |
| CYB5A    | 1.789E-12 | + | NUP35          | 9.631E-09 | + |
| C10orf26 | 1.829E-12 | + | LRRC42         | 9.982E-09 | + |
| RABL3    | 2.101E-12 | + | C19orf48       | 1.033E-08 | - |
| TMEM201  | 2.334E-12 | - | AUH            | 1.036E-08 | + |
| ISCU     | 2.41E-12  | + | TCF4           | 1.047E-08 | - |
| LMO4     | 2.536E-12 | - | HAUS1          | 1.095E-08 | + |
| B2M      | 2.627E-12 | + | METTL18        | 1.1E-08   | + |
| C6orf106 | 2.685E-12 | - | TMEM59         | 1.175E-08 | + |
| STOX2    | 2.777E-12 | - | NEDD1          | 1.197E-08 | + |
| RAVER1   | 2.783E-12 | - | NFYA           | 1.268E-08 | + |
| PLEKHB1  | 2.809E-12 | - | TMEM116        | 1.335E-08 | + |
| RIOK2    | 2.826E-12 | + | SLC25A24       | 1.361E-08 | + |
| TPK1     | 3.334E-12 | + | BCDIN3D        | 1.373E-08 | + |
| PIGB     | 3.483E-12 | + | FYN            | 1.39E-08  | - |
| SNX30    | 3.514E-12 | + | DDR2           | 1.424E-08 | - |
| PPRC1    | 3.546E-12 | - | HSPB2-C11orf52 | 1.454E-08 | + |
| RAD54L   | 3.621E-12 | - | SDHC           | 1.509E-08 | + |
| TM6SF1   | 3.688E-12 | + | LRRC6          | 1.592E-08 | + |
| GIT1     | 3.854E-12 | - | RSPH3          | 1.604E-08 | + |
| SSBP3    | 4.014E-12 | - | MYO1G          | 1.653E-08 | - |
| KIAA1647 | 4.243E-12 | - | UBR1           | 1.711E-08 | + |
| CEP164   | 4.534E-12 | - | PLBD2          | 1.803E-08 | - |
| TOMM40   | 4.605E-12 | - | MYNN           | 1.813E-08 | + |
| CHRM3    | 5.051E-12 | - | TMEM14A        | 1.824E-08 | + |
| PHLPP1   | 5.117E-12 | - | GK             | 1.866E-08 | + |
| ARHGEF11 | 5.246E-12 | - | SH3BP1         | 2.094E-08 | - |
| UBE2L6   | 6.128E-12 | + | DTWD1          | 2.137E-08 | + |
| CSNK1A1  | 6.183E-12 | + | CAPN7          | 2.177E-08 | + |
| SAMD4B   | 6.361E-12 | - | SLC35C2        | 2.224E-08 | - |
| ATG9A    | 6.421E-12 | - | FAM164A        | 2.308E-08 | - |
| Tmp21-II | 6.533E-12 | + | ARV1           | 2.371E-08 | + |
| KCNK5    | 6.739E-12 | - | IDE            | 2.38E-08  | + |
| MLLT4    | 6.82E-12  | - | SCO1           | 2.396E-08 | + |

|           |           |   |         |           |   |
|-----------|-----------|---|---------|-----------|---|
| SLMO1     | 7.038E-12 | - | UFC1    | 2.429E-08 | + |
| AGGF1     | 7.365E-12 | + | NCKAP1  | 2.511E-08 | + |
| NT5DC2    | 7.674E-12 | - | HAPLN3  | 2.744E-08 | - |
| MCM3APAS  | 8.191E-12 | - | SNX13   | 2.849E-08 | + |
| TCEAL1    | 8.419E-12 | + | FAM38A  | 2.87E-08  | - |
| ARMCX3    | 8.577E-12 | + | TMEM56  | 2.915E-08 | + |
| ITM2B     | 8.681E-12 | + | YTHDF1  | 2.931E-08 | - |
| USP21     | 9.229E-12 | - | CYB5R3  | 2.955E-08 | - |
| TSC22D3   | 9.402E-12 | + | OGFR    | 3.028E-08 | - |
| TMEM188   | 1.017E-11 | + | NME7    | 3.103E-08 | + |
| SSRP1     | 1.07E-11  | - | MATR3   | 3.154E-08 | + |
| HGS       | 1.089E-11 | - | IP6K2   | 3.581E-08 | + |
| SPTBN2    | 1.148E-11 | - | DYNLL1  | 3.814E-08 | + |
| FBXO4     | 1.226E-11 | + | MR1     | 3.874E-08 | + |
| ALOX5AP   | 1.228E-11 | + | DHX9    | 4.004E-08 | + |
| LOC161527 | 1.236E-11 | - | GGPS1   | 4.079E-08 | + |
| CYB561D2  | 1.248E-11 | + | ESR1    | 4.092E-08 | + |
| SUPT5H    | 1.275E-11 | - | PSMC6   | 4.159E-08 | + |
| NDUFS4    | 1.335E-11 | + | SCP2    | 4.29E-08  | + |
| KDM6A     | 1.423E-11 | + | MIOS    | 4.587E-08 | + |
| LOC729852 | 1.475E-11 | + | DAZAP2  | 4.617E-08 | + |
| TNPO2     | 1.478E-11 | - | DHX38   | 4.628E-08 | - |
| TMTC3     | 1.524E-11 | + | MAN2B1  | 4.675E-08 | - |
| PNRC2     | 1.567E-11 | + | TMBIM4  | 4.687E-08 | + |
| SPCS1     | 1.729E-11 | + | UBE2G1  | 4.924E-08 | + |
| DAD1      | 1.736E-11 | + | PNRC2   | 4.98E-08  | + |
| ZFAND6    | 1.741E-11 | + | STAM2   | 5.322E-08 | + |
| PPP1R9A   | 1.754E-11 | - | KIF5B   | 5.544E-08 | + |
| C9orf152  | 1.823E-11 | + | BCCIP   | 6.017E-08 | + |
| CTIF      | 1.845E-11 | - | ELMOD2  | 6.214E-08 | + |
| PTGR1     | 1.869E-11 | + | IFT88   | 6.912E-08 | + |
| FAM174A   | 1.918E-11 | + | FBXO31  | 7.15E-08  | - |
| ELOVL5    | 1.928E-11 | + | KBTBD3  | 7.177E-08 | + |
| ITFG1     | 2.089E-11 | + | XBP1    | 7.254E-08 | + |
| SLC40A1   | 2.092E-11 | + | RC74    | 7.377E-08 | + |
| TBC1D9    | 2.108E-11 | + | SPA17   | 7.562E-08 | + |
| MTUS1     | 2.157E-11 | + | SRGAP1  | 7.598E-08 | - |
| POLR1E    | 2.161E-11 | - | VASN    | 8.049E-08 | - |
| AK023756  | 2.162E-11 | - | PPP6R1  | 8.328E-08 | - |
| C15orf42  | 2.167E-11 | - | VPS29   | 8.404E-08 | + |
| CHMP5     | 2.191E-11 | + | UBE3A   | 8.553E-08 | + |
| CD46      | 2.242E-11 | + | CWF19L2 | 8.93E-08  | + |
| AK129717  | 2.303E-11 | - | ATPAF1  | 8.989E-08 | + |
| OBSCN     | 2.355E-11 | - | RAB4A   | 9.299E-08 | + |
| FURIN     | 2.382E-11 | - | CD7     | 9.305E-08 | - |
| SAMD1     | 2.503E-11 | - | UNC119B | 9.473E-08 | + |

|           |           |   |          |           |   |
|-----------|-----------|---|----------|-----------|---|
| MRPL2     | 2.71E-11  | - | TRIM13   | 9.593E-08 | + |
| GTSE1     | 2.711E-11 | - | ARFGAP1  | 9.639E-08 | - |
| MTPAP     | 2.785E-11 | - | RBM42    | 1.011E-07 | - |
| FAM82A2   | 2.821E-11 | + | ACADM    | 1.025E-07 | + |
| CTDP1     | 2.882E-11 | - | SSR2     | 1.053E-07 | + |
| LPAR6     | 2.898E-11 | + | NUDT18   | 1.065E-07 | + |
| PPP1R2    | 3.004E-11 | + | TPRKB    | 1.079E-07 | + |
| MORF4L2   | 3.186E-11 | + | ADAM10   | 1.128E-07 | + |
| LOC390705 | 3.399E-11 | - | TMC6     | 1.226E-07 | - |
| PSMA6     | 3.519E-11 | + | CLUL1    | 1.314E-07 | + |
| OSTF1     | 3.533E-11 | + | PDPR     | 1.315E-07 | - |
| FAM161A   | 3.601E-11 | - | RABL3    | 1.334E-07 | + |
| PPP2R5D   | 3.895E-11 | - | CD4      | 1.348E-07 | - |
| IL13RA1   | 4.051E-11 | + | TMEM69   | 1.351E-07 | + |
| ANAPC13   | 4.064E-11 | + | SPATA4   | 1.354E-07 | + |
| FANCE     | 4.219E-11 | - | ITM2C    | 1.361E-07 | - |
| AP3S1     | 4.312E-11 | + | KIAA1737 | 1.381E-07 | + |
| PLIN3     | 4.357E-11 | + | MAP4K1   | 1.438E-07 | - |
| TRAF2     | 4.361E-11 | - | CLDND2   | 1.458E-07 | - |
| DSCR3     | 4.507E-11 | + | BTBD1    | 1.473E-07 | + |
| BLM       | 4.525E-11 | - | BCOR     | 1.496E-07 | + |
| SF3A3     | 4.591E-11 | - | ZNF30    | 1.518E-07 | + |
| TTC8      | 4.65E-11  | + | UBA5     | 1.575E-07 | + |
| ProSAPiP1 | 4.703E-11 | - | WRN      | 1.674E-07 | + |
| PIGF      | 4.761E-11 | + | ZNF484   | 1.675E-07 | + |
| FAM171A1  | 4.992E-11 | - | APIP     | 1.695E-07 | + |
| TCF7L2    | 5.002E-11 | - | PGM2     | 1.713E-07 | + |
| FBXO8     | 5.373E-11 | + | SYK      | 1.762E-07 | - |
| TMEM131   | 5.402E-11 | + | GORAB    | 1.775E-07 | + |
| IPO13     | 5.537E-11 | - | UCHL3    | 1.814E-07 | + |
| NRTN      | 5.561E-11 | - | UNC50    | 1.833E-07 | + |
| PRRC2A    | 5.993E-11 | - | RIT1     | 1.857E-07 | + |
| TMEM192   | 6E-11     | + | LRRC40   | 1.902E-07 | + |
| MCM10     | 6.031E-11 | - | GJA1     | 1.952E-07 | + |
| PLEKHF2   | 6.048E-11 | + | ZMYND12  | 2.094E-07 | + |
| WDR74     | 6.103E-11 | - | ENPP4    | 2.097E-07 | + |
| PSMC6     | 6.184E-11 | + | MRAS     | 2.106E-07 | - |
| SEC23B    | 6.558E-11 | + | SEC23IP  | 2.165E-07 | + |
| FBXO41    | 6.905E-11 | - | STT3A    | 2.225E-07 | + |
| SNAPC4    | 6.985E-11 | - | SPOCK2   | 2.228E-07 | - |
| MYLIP     | 7.084E-11 | + | PIGB     | 2.265E-07 | + |
| UBE2O     | 7.334E-11 | - | JF432672 | 2.295E-07 | + |
| MYOF      | 7.712E-11 | + | PLCG1    | 2.298E-07 | - |
| PRDX3     | 7.733E-11 | + | TMEM86B  | 2.367E-07 | - |
| BC038245  | 7.988E-11 | - | MITD1    | 2.397E-07 | + |
| SQRDL     | 8.169E-11 | + | SYF2     | 2.514E-07 | + |

|           |           |   |           |           |   |
|-----------|-----------|---|-----------|-----------|---|
| POLE      | 8.528E-11 | - | WARS      | 2.535E-07 | - |
| PPARD     | 8.639E-11 | - | NARF      | 2.551E-07 | - |
| LZTS2     | 8.907E-11 | - | NSMCE4A   | 2.551E-07 | + |
| C4orf32   | 8.917E-11 | + | CELF1     | 2.674E-07 | + |
| MGAT2     | 8.98E-11  | + | GHITM     | 2.676E-07 | + |
| MED7      | 9.29E-11  | + | DIXDC1    | 2.69E-07  | + |
| GPR34     | 9.301E-11 | + | EFNB1     | 2.709E-07 | - |
| ARFIP1    | 9.342E-11 | + | RBBP4     | 2.715E-07 | + |
| SF3B3     | 9.445E-11 | - | PPWD1     | 2.844E-07 | + |
| ANKRA2    | 9.547E-11 | + | CASD1     | 2.905E-07 | + |
| PPP2CA    | 9.653E-11 | + | AP1M1     | 2.938E-07 | - |
| GPRC5B    | 9.674E-11 | - | FAM120AOS | 2.967E-07 | + |
| DNA2      | 9.807E-11 | - | POLR2B    | 2.979E-07 | + |
| LEO1      | 1.017E-10 | + | EYA2      | 2.98E-07  | - |
| ALG11     | 1.026E-10 | + | EIF2C2    | 2.99E-07  | - |
| FAM120AOS | 1.028E-10 | + | NSUN3     | 3.042E-07 | + |
| C15orf24  | 1.037E-10 | + | STEAP1    | 3.206E-07 | + |
| SAC3D1    | 1.046E-10 | - | VPS4A     | 3.268E-07 | - |
| CHD4      | 1.098E-10 | - | PMPCB     | 3.271E-07 | + |
| PRRC1     | 1.107E-10 | + | CNIH      | 3.275E-07 | + |
| ACTN4     | 1.122E-10 | - | PGR       | 3.299E-07 | + |
| KIF15     | 1.187E-10 | - | MED7      | 3.386E-07 | + |
| FOXA1     | 1.21E-10  | + | NT5DC2    | 3.47E-07  | - |
| NOP2      | 1.239E-10 | - | EHF       | 3.552E-07 | + |
| CHERP     | 1.282E-10 | - | C10orf32  | 3.603E-07 | + |
| POLR2F    | 1.302E-10 | - | PRKX      | 3.678E-07 | - |
| RECQL4    | 1.318E-10 | - | GPR89B    | 3.699E-07 | + |
| TFAP4     | 1.332E-10 | - | UBB       | 3.772E-07 | + |
| RCOR2     | 1.352E-10 | - | LARP6     | 3.877E-07 | - |
| C14orf45  | 1.422E-10 | + | ZNF787    | 3.894E-07 | - |
| AP3M1     | 1.48E-10  | + | AIF1L     | 3.942E-07 | - |
| ZNF514    | 1.486E-10 | - | HSPB11    | 3.976E-07 | + |
| NFIX      | 1.501E-10 | - |           |           |   |
| TOP1MT    | 1.509E-10 | - |           |           |   |
| CRYZL1    | 1.536E-10 | + |           |           |   |
| PYGO2     | 1.602E-10 | - |           |           |   |
| DNASE1L1  | 1.642E-10 | + |           |           |   |
| VOPP1     | 1.669E-10 | + |           |           |   |
| DHX33     | 1.682E-10 | - |           |           |   |
| MAPK9     | 1.803E-10 | + |           |           |   |
| UBC       | 1.811E-10 | - |           |           |   |
| USP13     | 1.828E-10 | - |           |           |   |
| TLR7      | 1.879E-10 | + |           |           |   |
| CMTM1     | 1.894E-10 | + |           |           |   |
| TMEM66    | 1.897E-10 | + |           |           |   |
| FBXW11    | 1.921E-10 | + |           |           |   |

|           |           |   |
|-----------|-----------|---|
| CNIH      | 1.943E-10 | + |
| WDR61     | 1.965E-10 | + |
| DMD       | 1.967E-10 | - |
| AFG3L2    | 2.049E-10 | - |
| ARHGEF4   | 2.127E-10 | - |
| QRICH2    | 2.204E-10 | - |
| TRIM16    | 2.249E-10 | - |
| KIAA0664  | 2.268E-10 | - |
| BMP2K     | 2.291E-10 | + |
| ZNF248    | 2.294E-10 | - |
| BLVRA     | 2.351E-10 | + |
| HPS3      | 2.409E-10 | + |
| STAG3L2   | 2.503E-10 | - |
| SNORA10   | 2.515E-10 | - |
| CTSO      | 2.571E-10 | + |
| ZNF142    | 2.586E-10 | - |
| GNL2      | 2.694E-10 | - |
| PMPCA     | 2.78E-10  | - |
| RBFOX2    | 2.811E-10 | - |
| DGAT2     | 2.849E-10 | - |
| ITPR1     | 3.003E-10 | + |
| RASD2     | 3.067E-10 | - |
| COPS7B    | 3.1E-10   | - |
| EPG5      | 3.139E-10 | - |
| PPARGC1B  | 3.142E-10 | - |
| RAB5C     | 3.26E-10  | + |
| ANKRD13B  | 3.439E-10 | - |
| EDEM1     | 3.456E-10 | + |
| VAMP3     | 3.562E-10 | + |
| AW972870  | 3.566E-10 | - |
| NFIB      | 3.58E-10  | - |
| SLC25A37  | 3.715E-10 | - |
| PLXNC1    | 3.719E-10 | + |
| GNAS      | 3.722E-10 | - |
| CAMSAP1L1 | 3.754E-10 | - |
| CCNG1     | 3.773E-10 | + |
| INPP4B    | 3.794E-10 | + |
| DEPDC5    | 3.808E-10 | - |
| JAK1      | 3.877E-10 | + |
| G3BP2     | 3.986E-10 | + |
| ANKRD16   | 4.038E-10 | - |
| TTK       | 4.118E-10 | - |
| UBE2A     | 4.171E-10 | + |
| EPHB3     | 4.174E-10 | - |
| FOSL1     | 4.198E-10 | - |
| AK022594  | 4.263E-10 | - |

|              |           |   |
|--------------|-----------|---|
| NOP10        | 4.461E-10 | + |
| CAPN10       | 4.51E-10  | - |
| SKP2         | 4.624E-10 | - |
| IDH1         | 4.636E-10 | + |
| BTF3         | 4.674E-10 | + |
| TRIP4        | 4.683E-10 | + |
| TMCO3        | 4.753E-10 | + |
| C10orf32     | 4.892E-10 | + |
| PLCB4        | 4.953E-10 | - |
| ILF3         | 4.97E-10  | - |
| PRSS53       | 5.003E-10 | - |
| TULP3        | 5.017E-10 | - |
| C16orf55     | 5.045E-10 | - |
| SLU7         | 5.05E-10  | + |
| NRIP1        | 5.079E-10 | + |
| PRKX         | 5.126E-10 | - |
| C5orf32      | 5.262E-10 | + |
| TMED2        | 5.432E-10 | + |
| FAM123B      | 5.503E-10 | - |
| C20orf20     | 5.503E-10 | - |
| EIF3E        | 5.523E-10 | - |
| E2F3         | 5.662E-10 | - |
| NOL9         | 5.691E-10 | - |
| CD2BP2       | 5.797E-10 | + |
| SEC23IP      | 5.888E-10 | + |
| CANX         | 5.961E-10 | + |
| COL27A1      | 5.987E-10 | - |
| CADM4        | 6.036E-10 | - |
| PTPRO        | 6.052E-10 | + |
| ERI3         | 6.178E-10 | - |
| MAPK4        | 6.233E-10 | - |
| C10orf32-AS3 | 6.239E-10 | + |
| MAN1C1       | 6.269E-10 | + |
| BYSL         | 6.399E-10 | - |
| FGFRL1       | 6.473E-10 | - |
| DPYD         | 6.629E-10 | + |
| MNDA         | 6.747E-10 | + |
| SYPL1        | 6.876E-10 | + |
| WDR5         | 6.902E-10 | - |
| RILPL2       | 6.95E-10  | + |
| ZNF318       | 7.058E-10 | - |
| DQ896551     | 7.076E-10 | + |
| BQ188538     | 7.245E-10 | - |
| NRG2         | 7.544E-10 | - |
| VPS25        | 7.636E-10 | + |
| SPTLC2       | 7.891E-10 | + |



|           |           |   |
|-----------|-----------|---|
| BIRC5     | 7.965E-10 | - |
| UGT8      | 8.161E-10 | - |
| MAFB      | 8.289E-10 | + |
| ETV6      | 8.337E-10 | - |
| C14orf147 | 8.339E-10 | + |
| PSMB8     | 8.417E-10 | + |
| KIFC1     | 8.43E-10  | - |
| WDR44     | 8.716E-10 | + |
| CHST3     | 8.773E-10 | - |
| TMEM85    | 8.783E-10 | + |
| RPRD2     | 8.793E-10 | - |
| ELAVL1    | 8.982E-10 | - |
| FBXO18    | 9.446E-10 | - |
| TRRAP     | 9.524E-10 | - |
| CTNNA1    | 9.625E-10 | + |
| GAS2L3    | 9.725E-10 | - |
| DTNB      | 9.895E-10 | - |
| HOXB2     | 9.959E-10 | + |
| GABBR2    | 1.017E-09 | - |
| MRPL22    | 1.034E-09 | + |
| NCS1      | 1.089E-09 | - |
| CABYR     | 1.11E-09  | - |
| MLF2      | 1.147E-09 | - |
| FOXP4     | 1.158E-09 | - |
| PCYT2     | 1.205E-09 | - |
| AK125440  | 1.236E-09 | - |
| GRN       | 1.281E-09 | + |
| CLASP1    | 1.299E-09 | - |
| TRAPPC2   | 1.3E-09   | + |
| ACOT1     | 1.35E-09  | + |
| PELO      | 1.357E-09 | + |
| CEP120    | 1.359E-09 | + |
| STK25     | 1.391E-09 | - |
| GABARAPL2 | 1.412E-09 | + |
| HOPX      | 1.424E-09 | + |
| ZNF692    | 1.43E-09  | - |
| IGBP1     | 1.464E-09 | + |
| TNPO3     | 1.465E-09 | - |
| RABEP1    | 1.465E-09 | + |
| KHDRBS3   | 1.474E-09 | - |
| MLPH      | 1.483E-09 | + |
| AZI1      | 1.509E-09 | - |
| NUDT3     | 1.559E-09 | - |
| POM121C   | 1.571E-09 | - |
| GPRIN2    | 1.581E-09 | - |
| ARID4A    | 1.622E-09 | + |

|          |           |   |
|----------|-----------|---|
| MS4A6A   | 1.632E-09 | + |
| RNASE6   | 1.665E-09 | + |
| RPAP3    | 1.703E-09 | + |
| TOP3A    | 1.703E-09 | - |
| GIMAP6   | 1.738E-09 | + |
| SPG11    | 1.742E-09 | + |
| GNG10    | 1.759E-09 | + |
| UBQLN4   | 1.79E-09  | - |
| FTSJD1   | 1.815E-09 | + |
| RGS18    | 1.904E-09 | + |
| NFATC1   | 1.909E-09 | - |
| KAZN     | 1.916E-09 | - |
| PI4KB    | 1.919E-09 | - |
| RIN2     | 1.96E-09  | + |
| SOX8     | 1.988E-09 | - |
| MSL3     | 1.995E-09 | - |
| HSD17B8  | 2.075E-09 | + |
| TAF6L    | 2.223E-09 | - |
| PFDN1    | 2.247E-09 | + |
| MLL4     | 2.275E-09 | - |
| DARS     | 2.352E-09 | - |
| DLGAP4   | 2.372E-09 | - |
| STAM2    | 2.374E-09 | + |
| TBCA     | 2.4E-09   | + |
| ZMAT2    | 2.511E-09 | + |
| NKRF     | 2.523E-09 | - |
| CPA3     | 2.558E-09 | + |
| POU2F1   | 2.601E-09 | - |
| NHLRC3   | 2.617E-09 | + |
| SOX10    | 2.72E-09  | - |
| TTYH1    | 2.771E-09 | - |
| UBL3     | 2.78E-09  | + |
| LCMT2    | 2.798E-09 | + |
| ZNF74    | 2.831E-09 | - |
| PRKCH    | 2.88E-09  | + |
| EN1      | 2.884E-09 | - |
| RAB9B    | 2.924E-09 | - |
| ADCK3    | 2.939E-09 | - |
| WAPAL    | 2.959E-09 | + |
| MOCS2    | 2.964E-09 | + |
| ALDOA    | 3.023E-09 | + |
| ACOT4    | 3.042E-09 | + |
| HAUS8    | 3.062E-09 | - |
| IK       | 3.126E-09 | + |
| HSD11B1L | 3.262E-09 | - |
| HSD17B4  | 3.284E-09 | + |

|             |           |   |
|-------------|-----------|---|
| C7orf44     | 3.327E-09 | + |
| AB074162    | 3.456E-09 | - |
| C14orf142   | 3.466E-09 | + |
| BRPF1       | 3.471E-09 | - |
| DYNC2LI1    | 3.496E-09 | + |
| POLD1       | 3.516E-09 | - |
| DHX34       | 3.535E-09 | - |
| UQCRQ       | 3.585E-09 | + |
| PIGH        | 3.628E-09 | + |
| CNTROB      | 3.703E-09 | - |
| PPME1       | 3.756E-09 | - |
| RPA3        | 3.756E-09 | + |
| CDCA3       | 3.784E-09 | - |
| ATXN7L3     | 3.787E-09 | - |
| BC009629    | 3.802E-09 | - |
| FRMD3       | 3.847E-09 | - |
| ZNF326      | 3.907E-09 | - |
| CDK19       | 3.967E-09 | - |
| RAVER2      | 3.968E-09 | - |
| BNIP3L      | 3.976E-09 | + |
| PVR         | 4.213E-09 | - |
| AKR1A1      | 4.264E-09 | + |
| EIF4G2      | 4.27E-09  | + |
| PSMC1       | 4.684E-09 | + |
| UBTD2       | 4.751E-09 | + |
| GNG11       | 4.785E-09 | + |
| CYB5R4      | 4.849E-09 | + |
| CDC25A      | 4.943E-09 | - |
| OTUB1       | 4.995E-09 | - |
| EFCAB11     | 5.017E-09 | + |
| PSMD10      | 5.051E-09 | + |
| TAF7        | 5.056E-09 | + |
| SAMSN1      | 5.064E-09 | + |
| DKFZp761E19 | 5.065E-09 | - |
| COQ5        | 5.156E-09 | + |
| MRPL54      | 5.205E-09 | + |
| ARL2BP      | 5.29E-09  | + |
| SNRPN       | 5.312E-09 | + |
| FOXM1       | 5.373E-09 | - |
| TSPAN13     | 5.447E-09 | + |
| TMEM50B     | 5.549E-09 | + |
| SYF2        | 5.551E-09 | + |
| LAMTOR3     | 5.696E-09 | + |
| DRAM2       | 5.701E-09 | + |
| VANGL2      | 5.711E-09 | - |
| FUBP3       | 5.753E-09 | + |

|           |           |   |
|-----------|-----------|---|
| IGFBP7    | 5.844E-09 | + |
| ROPN1B    | 5.952E-09 | - |
| CDV3      | 6.01E-09  | + |
| SEMA6C    | 6.021E-09 | - |
| ZNF484    | 6.108E-09 | + |
| AK095715  | 6.138E-09 | - |
| SIDT1     | 6.162E-09 | + |
| EXTL3     | 6.424E-09 | - |
| VAMP5     | 6.443E-09 | + |
| NSA2      | 6.486E-09 | + |
| GPR3      | 6.507E-09 | - |
| NUP188    | 6.542E-09 | - |
| SPARCL1   | 6.564E-09 | + |
| CASP8     | 6.618E-09 | + |
| COX7C     | 6.621E-09 | + |
| EIF2B2    | 6.691E-09 | + |
| PTPRE     | 6.917E-09 | + |
| JAG2      | 6.977E-09 | - |
| EIF3B     | 7.065E-09 | - |
| CDH19     | 7.133E-09 | - |
| AMACR     | 7.139E-09 | + |
| C20orf30  | 7.158E-09 | + |
| SLC45A4   | 7.184E-09 | - |
| TUB       | 7.242E-09 | - |
| PSME1     | 7.244E-09 | + |
| ROPN1     | 7.254E-09 | - |
| KIAA0562  | 7.441E-09 | - |
| MOSC2     | 7.492E-09 | + |
| EIF4E     | 7.541E-09 | + |
| CDC20     | 7.638E-09 | - |
| RNF4      | 7.769E-09 | + |
| C10orf128 | 7.771E-09 | + |
| RBM10     | 7.851E-09 | - |
| MTF1      | 7.857E-09 | - |
| BHLHE40   | 7.885E-09 | + |
| ATP6V1D   | 8.045E-09 | + |
| B3GAT3    | 8.11E-09  | - |
| SMG7      | 8.211E-09 | - |
| NOSTRIN   | 8.316E-09 | + |
| NEURL4    | 8.408E-09 | - |
| UNC50     | 8.415E-09 | + |
| MCM5      | 8.494E-09 | - |
| BX647938  | 8.539E-09 | - |
| RNF103    | 8.691E-09 | + |
| STX8      | 8.761E-09 | + |
| SAP30BP   | 8.807E-09 | - |

|          |           |   |
|----------|-----------|---|
| MRPS18C  | 8.896E-09 | + |
| FKRP     | 8.954E-09 | - |
| CLIP2    | 9.033E-09 | - |
| SPEG     | 9.154E-09 | - |
| YTHDC2   | 9.172E-09 | + |
| DDX51    | 9.204E-09 | - |
| SLC6A8   | 9.248E-09 | - |
| PUS7     | 9.344E-09 | - |
| GMPPB    | 9.35E-09  | + |
| TMED10   | 9.403E-09 | + |
| UBR1     | 9.416E-09 | + |
| CHCHD5   | 9.423E-09 | + |
| ZNF707   | 9.732E-09 | - |
| CHMP2A   | 9.971E-09 | + |
| ARMC6    | 9.977E-09 | - |
| TBCB     | 1.005E-08 | - |
| GCNT2    | 1.005E-08 | - |
| REV1     | 1.025E-08 | + |
| TBRG4    | 1.031E-08 | - |
| MARK2    | 1.036E-08 | - |
| TINF2    | 1.04E-08  | + |
| FBP1     | 1.041E-08 | + |
| MIIP     | 1.049E-08 | - |
| XPO5     | 1.072E-08 | - |
| DDX39B   | 1.079E-08 | - |
| F13A1    | 1.084E-08 | + |
| PDHA1    | 1.087E-08 | - |
| SRP9     | 1.096E-08 | + |
| TMCC2    | 1.1E-08   | - |
| TYRO3    | 1.104E-08 | - |
| TAF4B    | 1.119E-08 | - |
| KIAA0494 | 1.147E-08 | + |
| LG MN    | 1.152E-08 | + |
| HM13     | 1.168E-08 | + |
| RTKN     | 1.188E-08 | - |
| VAR S    | 1.194E-08 | - |
| SLC6A10P | 1.202E-08 | - |
| MMS22L   | 1.205E-08 | - |
| GDPD5    | 1.214E-08 | - |
| PHKB     | 1.241E-08 | + |
| TATDN2   | 1.248E-08 | - |
| ZNF3     | 1.248E-08 | - |
| ZNF473   | 1.253E-08 | - |
| MRPL12   | 1.255E-08 | - |
| BAG6     | 1.262E-08 | - |
| SKAP2    | 1.263E-08 | + |

|           |           |   |
|-----------|-----------|---|
| AK022085  | 1.271E-08 | - |
| ZNF691    | 1.273E-08 | - |
| RRP12     | 1.286E-08 | - |
| ZYG11B    | 1.313E-08 | - |
| POLD4     | 1.33E-08  | + |
| NPLOC4    | 1.34E-08  | - |
| RRM2B     | 1.363E-08 | + |
| NDUFAF1   | 1.417E-08 | + |
| PDE9A     | 1.437E-08 | - |
| ALG1      | 1.44E-08  | + |
| KIAA0353  | 1.442E-08 | - |
| CHTF18    | 1.46E-08  | - |
| DDX60     | 1.476E-08 | + |
| FAM59B    | 1.497E-08 | - |
| MRFAP1    | 1.516E-08 | + |
| ITGAV     | 1.519E-08 | + |
| PTCD2     | 1.54E-08  | + |
| BEX4      | 1.571E-08 | + |
| IRF2BP1   | 1.576E-08 | - |
| C9orf103  | 1.576E-08 | + |
| ARHGAP21  | 1.585E-08 | - |
| PCBP4     | 1.603E-08 | - |
| HJURP     | 1.637E-08 | - |
| ZNF574    | 1.654E-08 | - |
| LOC389906 | 1.668E-08 | - |
| FBXL3     | 1.702E-08 | + |
| EIF5      | 1.722E-08 | + |
| RPRD1A    | 1.81E-08  | - |
| UBB       | 1.856E-08 | + |
| LOC647979 | 1.859E-08 | + |
| CNIH2     | 1.865E-08 | - |
| CDCA8     | 1.894E-08 | - |
| AF038185  | 1.909E-08 | - |
| ZNF330    | 1.915E-08 | + |
| LLPH      | 1.932E-08 | + |
| CENPF     | 1.932E-08 | - |
| ELK1      | 1.972E-08 | - |
| C14orf135 | 1.974E-08 | + |
| MNT       | 1.99E-08  | - |
| LTC4S     | 1.992E-08 | + |
| PPP2R3B   | 2.015E-08 | - |
| SRRT      | 2.043E-08 | - |
| ZNF529    | 2.064E-08 | - |
| SEPHS1    | 2.079E-08 | - |
| DQ896666  | 2.136E-08 | + |
| RBM38     | 2.166E-08 | - |

|          |           |   |
|----------|-----------|---|
| FRMD6    | 2.244E-08 | + |
| SCMH1    | 2.25E-08  | - |
| GFM2     | 2.253E-08 | + |
| YPEL2    | 2.266E-08 | + |
| FZD9     | 2.271E-08 | - |
| C17orf53 | 2.289E-08 | - |
| HDAC5    | 2.29E-08  | - |
| DCN      | 2.308E-08 | + |
| RCC2     | 2.32E-08  | - |
| ALMS1    | 2.327E-08 | - |
| PPIC     | 2.334E-08 | + |
| STRN4    | 2.35E-08  | - |
| DGCR8    | 2.35E-08  | - |
| MAP4K3   | 2.355E-08 | + |
| NAA40    | 2.368E-08 | - |
| ZNF217   | 2.375E-08 | + |
| NCAN     | 2.391E-08 | - |
| EPHB1    | 2.412E-08 | - |
| ATP6V1A  | 2.419E-08 | + |
| HLA-DRA  | 2.42E-08  | + |
| ITGB5    | 2.427E-08 | + |
| NFKB2    | 2.475E-08 | - |
| NFE2L2   | 2.494E-08 | + |
| MSR1     | 2.517E-08 | + |
| SC5DL    | 2.537E-08 | + |
| NPTN     | 2.566E-08 | + |
| SERF2    | 2.593E-08 | + |
| C6orf26  | 2.596E-08 | - |
| POLR3GL  | 2.597E-08 | + |
| PPP1R3C  | 2.604E-08 | + |
| CCDC77   | 2.617E-08 | - |
| STARD3NL | 2.64E-08  | + |
| NCEH1    | 2.681E-08 | + |
| KDM1A    | 2.707E-08 | - |
| TRMT61A  | 2.749E-08 | - |
| EEF1A1   | 2.758E-08 | + |
| AL109696 | 2.781E-08 | - |
| MIOS     | 2.797E-08 | + |
| C19orf48 | 2.797E-08 | - |
| SLC35A3  | 2.807E-08 | + |
| MDP1     | 2.823E-08 | + |
| MAP3K11  | 2.883E-08 | - |
| TGOLN2   | 2.923E-08 | + |
| RARRES3  | 2.995E-08 | + |
| ASAH1    | 3.016E-08 | + |
| TTLL4    | 3.042E-08 | - |

|           |           |   |
|-----------|-----------|---|
| ZDHC8     | 3.077E-08 | - |
| KIF2C     | 3.093E-08 | - |
| AGAP3     | 3.134E-08 | - |
| SERPINA1  | 3.154E-08 | + |
| KBTBD4    | 3.217E-08 | + |
| AIF1      | 3.232E-08 | + |
| ZMYND19   | 3.289E-08 | - |
| VPS41     | 3.289E-08 | + |
| BAIAP2L2  | 3.316E-08 | - |
| CACNA1A   | 3.347E-08 | - |
| PNPLA6    | 3.376E-08 | - |
| TMX1      | 3.405E-08 | + |
| RSPO2     | 3.405E-08 | - |
| COX17     | 3.505E-08 | + |
| C5orf15   | 3.509E-08 | + |
| LYG1      | 3.514E-08 | - |
| LMBRD1    | 3.537E-08 | + |
| UPF1      | 3.546E-08 | - |
| PAIP2     | 3.574E-08 | + |
| CXXC1     | 3.584E-08 | - |
| P/OKcl.19 | 3.706E-08 | - |
| DIS3L2    | 3.724E-08 | - |
| SETDB1    | 3.773E-08 | - |
| SUPV3L1   | 3.801E-08 | - |
| SPTBN5    | 3.809E-08 | - |
| HIPK2     | 3.864E-08 | - |
| STOM      | 3.967E-08 | + |
| SH3GL3    | 3.974E-08 | - |
| POSTN     | 3.984E-08 | + |
| GATM      | 3.99E-08  | + |
| ASB6      | 4.015E-08 | - |
| USP53     | 4.051E-08 | + |
| C5orf44   | 4.226E-08 | + |
| PLCH1     | 4.266E-08 | - |
| AHNAK     | 4.27E-08  | + |
| SMYD5     | 4.295E-08 | - |
| KLC2      | 4.329E-08 | - |
| ASXL1     | 4.361E-08 | - |
| ATP5J     | 4.366E-08 | + |
| NDUFA12   | 4.444E-08 | + |
| SNORA64   | 4.473E-08 | - |
| CCNL2     | 4.556E-08 | + |
| GMPR2     | 4.562E-08 | + |
| PIGP      | 4.599E-08 | + |
| SFRP4     | 4.626E-08 | + |
| ARF4      | 4.681E-08 | + |



|          |           |   |
|----------|-----------|---|
| AFF4     | 4.687E-08 | + |
| ARL5B    | 4.753E-08 | - |
| EID1     | 4.791E-08 | + |
| MAP1S    | 4.796E-08 | - |
| HLA-DPA1 | 4.798E-08 | + |
| SEC61G   | 4.875E-08 | + |
| SCHIP1   | 4.885E-08 | - |
| CX3CR1   | 4.891E-08 | + |
| FAM100A  | 4.914E-08 | - |
| FAM90A7  | 4.964E-08 | - |
| CRTAP    | 4.983E-08 | + |
| PCCA     | 5.019E-08 | + |
| IL10RB   | 5.051E-08 | + |
| SUCLA2   | 5.067E-08 | + |
| RUNX2    | 5.085E-08 | + |
| C18orf56 | 5.087E-08 | - |
| RAB27A   | 5.099E-08 | + |
| ZNF282   | 5.126E-08 | - |
| STIL     | 5.21E-08  | - |
| ATP5F1   | 5.21E-08  | + |
| LAMP2    | 5.323E-08 | + |
| TRIM5    | 5.4E-08   | + |
| PEX2     | 5.404E-08 | + |
| PLOD1    | 5.423E-08 | - |
| UBE2D3   | 5.442E-08 | + |
| CNKSRR3  | 5.449E-08 | - |
| ACVR2B   | 5.562E-08 | - |
| NDUFB3   | 5.585E-08 | + |
| SLC31A2  | 5.628E-08 | + |
| ZNF143   | 5.666E-08 | + |
| DAXX     | 5.678E-08 | - |
| USP5     | 5.7E-08   | - |
| FAM89B   | 5.72E-08  | - |
| PIGT     | 5.737E-08 | + |
| SPCS2    | 5.751E-08 | + |
| C16orf5  | 5.792E-08 | - |
| AARS2    | 5.793E-08 | - |
| CNOT10   | 5.829E-08 | - |
| PPP1R12B | 5.831E-08 | + |
| P53TG1   | 5.901E-08 | + |
| SEC22C   | 5.959E-08 | + |
| SLC6A15  | 5.959E-08 | - |
| HMG1     | 6.005E-08 | + |
| SNORD38A | 6.039E-08 | - |
| HGC6.4   | 6.083E-08 | - |
| TMED5    | 6.091E-08 | + |

|          |           |   |
|----------|-----------|---|
| ZNF512B  | 6.12E-08  | - |
| GNG12    | 6.165E-08 | + |
| FCHO2    | 6.198E-08 | + |
| RNF220   | 6.216E-08 | - |
| ATP7A    | 6.242E-08 | + |
| KLHL17   | 6.332E-08 | - |
| IQCE     | 6.332E-08 | - |
| INO80B   | 6.36E-08  | - |
| GIGYF1   | 6.382E-08 | - |
| VWA5A    | 6.385E-08 | + |
| C11orf95 | 6.449E-08 | - |
| FMO6P    | 6.512E-08 | - |
| ZNF552   | 6.572E-08 | + |
| MGAT4A   | 6.583E-08 | + |
| RIMS3    | 6.605E-08 | - |
| FBXO3    | 6.643E-08 | + |
| PA2G4    | 6.682E-08 | - |
| SUSD3    | 6.692E-08 | + |
| EIF4E3   | 6.697E-08 | + |
| SH2B3    | 6.739E-08 | + |
| NR2C2AP  | 6.874E-08 | - |
| DMWD     | 6.89E-08  | - |
| GNPDA2   | 6.95E-08  | + |
| ARHGEF2  | 7.048E-08 | - |
| TMEM39B  | 7.116E-08 | - |
| ARMCX6   | 7.16E-08  | + |
| CYBRD1   | 7.168E-08 | + |
| GLI4     | 7.236E-08 | - |
| FAP      | 7.253E-08 | + |
| TM9SF1   | 7.53E-08  | + |
| CASP4    | 7.593E-08 | + |
| TRIM2    | 7.609E-08 | - |
| ANAPC10  | 7.689E-08 | + |
| MORC3    | 7.706E-08 | + |
| NR2C2    | 7.722E-08 | - |
| SGPP1    | 7.974E-08 | + |
| GPT2     | 8.015E-08 | - |
| UPF2     | 8.019E-08 | - |
| ZBTB38   | 8.063E-08 | + |
| BAZ1B    | 8.096E-08 | - |
| ING2     | 8.185E-08 | + |
| VAX2     | 8.19E-08  | - |
| MRPS27   | 8.263E-08 | + |
| LMBRD2   | 8.333E-08 | + |
| KANK4    | 8.355E-08 | - |
| POLR1C   | 8.377E-08 | - |

|          |           |   |
|----------|-----------|---|
| TRAPPC4  | 8.559E-08 | + |
| MRPL55   | 8.592E-08 | - |
| HOOK1    | 8.703E-08 | - |
| H2AFX    | 8.753E-08 | - |
| FAM71E1  | 8.805E-08 | - |
| NTRK3    | 8.859E-08 | - |
| PRPS1    | 9.188E-08 | + |
| SNX13    | 9.205E-08 | + |
| DALRD3   | 9.216E-08 | + |
| CPSF1    | 9.232E-08 | - |
| B4GALNT4 | 9.311E-08 | - |
| C6orf211 | 9.311E-08 | + |
| CD93     | 9.525E-08 | + |
| AGR3     | 9.621E-08 | + |
| SLC25A11 | 9.681E-08 | - |
| ACCN3    | 9.737E-08 | - |
| CR614803 | 9.743E-08 | + |
| ZNF358   | 9.817E-08 | - |
| CCDC126  | 9.925E-08 | + |
| SRM      | 9.961E-08 | - |
| ENPP4    | 1E-07     | + |
| RNF135   | 1.001E-07 | + |
| EFNB1    | 1.002E-07 | - |
| MBD3     | 1.007E-07 | - |
| PPP1R14B | 1.023E-07 | - |
| ID3      | 1.026E-07 | + |
| SRP14    | 1.026E-07 | + |
| BRD3     | 1.036E-07 | - |
| ELK4     | 1.04E-07  | - |
| APPL2    | 1.04E-07  | + |
| MCM7     | 1.051E-07 | - |
| VGLL4    | 1.054E-07 | - |
| MFGE8    | 1.068E-07 | - |
| SHC4     | 1.086E-07 | - |
| TLR3     | 1.112E-07 | + |
| CCDC123  | 1.118E-07 | - |
| ABCG1    | 1.119E-07 | + |
| SCRIB    | 1.131E-07 | - |
| CCDC53   | 1.134E-07 | + |
| NOP14    | 1.147E-07 | - |
| CHMP4B   | 1.15E-07  | + |
| KLHL2    | 1.156E-07 | + |
| TMBIM6   | 1.158E-07 | + |
| NELF     | 1.167E-07 | - |
| CLEC4A   | 1.168E-07 | + |
| GALC     | 1.17E-07  | + |

|            |           |   |
|------------|-----------|---|
| BG564551   | 1.207E-07 | - |
| HIC2       | 1.217E-07 | - |
| CTSK       | 1.253E-07 | + |
| CXorf40A   | 1.253E-07 | + |
| PNPO       | 1.281E-07 | + |
| PTCH1      | 1.292E-07 | - |
| PLEKHG6    | 1.292E-07 | - |
| ZNF410     | 1.293E-07 | + |
| C16orf72   | 1.296E-07 | + |
| ZNFPHEX133 | 1.302E-07 | - |
| RBM15      | 1.308E-07 | - |
| SLC29A3    | 1.309E-07 | + |
| WDR26      | 1.323E-07 | + |
| BRE        | 1.34E-07  | + |
| ZFYVE16    | 1.349E-07 | + |
| CCDC86     | 1.354E-07 | - |
| CTSH       | 1.357E-07 | + |
| ARID1A     | 1.357E-07 | + |
| SLCO2B1    | 1.363E-07 | + |
| TONSL      | 1.379E-07 | - |
| ERCC8      | 1.392E-07 | + |
| CERK       | 1.407E-07 | - |
| TFF3       | 1.411E-07 | + |
| CHST15     | 1.421E-07 | + |
| AL133627   | 1.421E-07 | - |
| TMSB4X     | 1.433E-07 | + |
| DERL2      | 1.445E-07 | + |
| POLQ       | 1.477E-07 | - |
| DUS3L      | 1.491E-07 | - |
| SLC4A3     | 1.494E-07 | - |
| ZNF687     | 1.507E-07 | - |
| PGK1       | 1.512E-07 | + |
| RASA1      | 1.529E-07 | + |
| HLA-DQA1   | 1.534E-07 | + |
| SNORD56    | 1.54E-07  | - |
| MFAP3      | 1.547E-07 | + |
| UBE2G1     | 1.547E-07 | + |
| DCK        | 1.548E-07 | + |
| CPVL       | 1.576E-07 | + |
| ICOSLG     | 1.579E-07 | - |
| DDA1       | 1.589E-07 | - |
| MUTYH      | 1.589E-07 | - |
| CBFA2T2    | 1.603E-07 | - |
| PARVB      | 1.607E-07 | - |
| MAP2K1     | 1.609E-07 | + |
| C13orf27   | 1.618E-07 | + |

|           |           |   |
|-----------|-----------|---|
| CMBL      | 1.621E-07 | + |
| HSPA8     | 1.658E-07 | + |
| FLJ44124  | 1.658E-07 | - |
| BQ709011  | 1.666E-07 | - |
| PTBP1     | 1.677E-07 | - |
| ARID4B    | 1.693E-07 | - |
| RBM42     | 1.714E-07 | - |
| TGFB3     | 1.722E-07 | + |
| PPA2      | 1.728E-07 | + |
| DCAF15    | 1.76E-07  | - |
| RUNDC2A   | 1.771E-07 | + |
| RDBP      | 1.784E-07 | - |
| TICAM2    | 1.809E-07 | + |
| SC4MOL    | 1.818E-07 | + |
| PRPF19    | 1.881E-07 | - |
| THAP7     | 1.885E-07 | - |
| CPEB4     | 1.894E-07 | + |
| NCK2      | 1.914E-07 | - |
| DQ577523  | 1.94E-07  | - |
| ART3      | 1.947E-07 | - |
| DYNLT3    | 1.96E-07  | + |
| LITAF     | 1.984E-07 | + |
| ZEB2      | 1.988E-07 | + |
| SON       | 1.995E-07 | + |
| SPOPL     | 2.012E-07 | + |
| KRT9      | 2.024E-07 | - |
| SBK1      | 2.032E-07 | - |
| PARP9     | 2.039E-07 | + |
| HBXIP     | 2.052E-07 | + |
| TTLL12    | 2.064E-07 | - |
| THBS1     | 2.074E-07 | + |
| ST3GAL4   | 2.081E-07 | - |
| DNAJB12   | 2.092E-07 | + |
| RPUSD3    | 2.103E-07 | - |
| RAD9A     | 2.167E-07 | - |
| PPP1R14C  | 2.169E-07 | - |
| CD237904  | 2.173E-07 | - |
| EPHB6     | 2.204E-07 | - |
| RPS19     | 2.223E-07 | - |
| C19orf47  | 2.234E-07 | - |
| NOTCH1    | 2.251E-07 | - |
| ACOX2     | 2.257E-07 | + |
| CIC       | 2.295E-07 | - |
| LOC202181 | 2.31E-07  | - |
| SYNC      | 2.312E-07 | + |
| DYNLL1    | 2.339E-07 | + |

|          |           |   |
|----------|-----------|---|
| TC2N     | 2.344E-07 | + |
| CLIC1    | 2.359E-07 | + |
| RNF165   | 2.364E-07 | - |
| CHAF1A   | 2.395E-07 | - |
| RNF150   | 2.403E-07 | - |
| LSM3     | 2.446E-07 | + |
| NMT2     | 2.477E-07 | - |
| ALDOB    | 2.479E-07 | - |
| FAM127B  | 2.481E-07 | - |
| DUSP1    | 2.507E-07 | + |
| C1orf46  | 2.52E-07  | - |
| AURKB    | 2.524E-07 | - |
| COMMD8   | 2.544E-07 | + |
| IL34     | 2.555E-07 | - |
| FUCA1    | 2.572E-07 | + |
| PLXNB1   | 2.578E-07 | - |
| TMEM167B | 2.597E-07 | + |
| PRPF38A  | 2.61E-07  | - |
| ANKRD23  | 2.614E-07 | - |
| SERBP1   | 2.615E-07 | - |
| PPM1G    | 2.641E-07 | - |
| MAT2B    | 2.684E-07 | + |
| TMEM55B  | 2.692E-07 | + |
| SMCR7L   | 2.692E-07 | - |
| RALBP1   | 2.703E-07 | - |
| BZW1     | 2.719E-07 | + |
| RPRML    | 2.722E-07 | - |
| CA12     | 2.735E-07 | + |
| RAD23A   | 2.764E-07 | - |
| CTU1     | 2.787E-07 | - |
| RCBTB2   | 2.796E-07 | + |
| ZNF292   | 2.812E-07 | - |
| AW020614 | 2.835E-07 | - |
| POU5F1   | 2.841E-07 | - |
| MORF4L1  | 2.849E-07 | + |
| INCENP   | 2.856E-07 | - |
| PHGDH    | 2.879E-07 | - |
| AX747098 | 2.887E-07 | - |
| XYLB     | 2.888E-07 | - |
| TBC1D10B | 2.89E-07  | - |
| NDUFV1   | 2.9E-07   | - |
| PRKAG1   | 2.922E-07 | + |
| FLJ41455 | 2.923E-07 | - |
| FUT8     | 2.926E-07 | + |
| TM2D1    | 2.928E-07 | + |
| SHANK3   | 2.931E-07 | - |

|          |           |   |
|----------|-----------|---|
| CTPS     | 2.966E-07 | - |
| SRGAP2   | 2.966E-07 | - |
| PLEKHA3  | 2.979E-07 | + |
| SLC25A46 | 2.99E-07  | + |
| TMEM158  | 2.995E-07 | - |
| KHDRBS1  | 3.008E-07 | + |
| ERLEC1   | 3.024E-07 | + |
| C1orf135 | 3.037E-07 | - |
| POC1B    | 3.052E-07 | + |
| HINT1    | 3.056E-07 | + |
| CEBPG    | 3.068E-07 | - |
| IKZF5    | 3.082E-07 | + |
| ARHGAP12 | 3.096E-07 | + |
| FBXO10   | 3.108E-07 | - |
| TMEM126B | 3.127E-07 | + |
| SKI      | 3.161E-07 | - |
| TRIT1    | 3.162E-07 | - |
| PLAC8L1  | 3.177E-07 | - |
| ATG3     | 3.2E-07   | + |
| ATXN2L   | 3.221E-07 | - |
| LRP3     | 3.231E-07 | - |
| ATP6AP2  | 3.251E-07 | + |
| NRP1     | 3.34E-07  | + |
| MRPS34   | 3.35E-07  | + |
| SLFN12   | 3.397E-07 | + |
| SLC25A24 | 3.429E-07 | + |
| CARM1    | 3.446E-07 | - |
| TOB2     | 3.464E-07 | - |
| LAMTOR1  | 3.535E-07 | + |
| MRPS2    | 3.569E-07 | - |
| WDR46    | 3.571E-07 | - |
| CHP      | 3.574E-07 | + |
| NES      | 3.586E-07 | - |
| GPR68    | 3.587E-07 | + |
| KIAA0247 | 3.59E-07  | + |
| UBXN8    | 3.594E-07 | + |
| TDG      | 3.596E-07 | - |
| PCNP     | 3.617E-07 | + |
| TNFAIP8  | 3.643E-07 | + |
| FYCO1    | 3.653E-07 | + |
| NR3C1    | 3.682E-07 | + |
| AP1G1    | 3.725E-07 | + |
| QSOX2    | 3.753E-07 | - |
| ANO6     | 3.771E-07 | + |
| PPAP2B   | 3.783E-07 | + |
| SLC7A8   | 3.786E-07 | + |

|          |           |   |
|----------|-----------|---|
| ATP6V0C  | 3.789E-07 | + |
| TJP1     | 3.794E-07 | + |
| ALKBH7   | 3.802E-07 | + |
| DUSP8    | 3.816E-07 | - |
| BC071719 | 3.828E-07 | + |
| MGAT3    | 3.835E-07 | - |
| FAM100B  | 3.843E-07 | - |
| C11orf68 | 3.852E-07 | - |
| SLX1A    | 3.858E-07 | + |
| SEPHS2   | 3.867E-07 | + |
| MYPOP    | 3.881E-07 | - |
| OSTCP1   | 3.885E-07 | - |
| CCNH     | 3.906E-07 | + |
| MITD1    | 3.914E-07 | + |
| SLC39A6  | 3.952E-07 | + |
