# Supplementary material for: Trimodal distribution of arylamine N-acetyltransferase 1 mRNA in breast cancer tumors: association with overall survival and drug resistance
Source: PubMed Central journal article supplement (PMC6029418; doi:10.1186/s12864-018-4894-4), 2018-07-03
Supplement: 12864_2018_4894_MOESM5_ESM.pdf [file 12864_2018_4894_MOESM5_ESM.pdf]

Table S2. The Cox proportional hazard regression models based on survival for NAT1 sub-populations, tumour characteristics and treatment.

| Variable                       | Univariate       |         | Multivariate       |         |
|--------------------------------|------------------|---------|--------------------|---------|
|                                | HR (95% CI)      | p       | HR (95% CI)        | p       |
| NAT1                           | 0.75 (0.67-0.84) | <0.0001 | 0.84 (0.74-0.95)   | 0.007   |
| Tumor size                     | 1.02 (1.01-1.02) | <0.0001 | 1.01 (1.007-1.017) | <0.0001 |
| Age at Diagnosis               | 1.00 (0.99-1.01) | 0.85    | 1.03 (1.02-1.04)   | <0.0001 |
| Menopause                      | 0.88 (0.71-1.24) | 0.26    | 0.71 (0.51-1.00)   | 0.054   |
| Chemotherapy<br>(No vs Yes)    | 0.41 (0.33-0.50) | <0.0001 | 0.62 (0.54-0.70)   | <0.0001 |
| Radiotherapy<br>(No vs Yes)    | 0.84 (0.69-1.02) | 0.085   | 1.04 (0.84-1.28)   | 0.88    |
| Hormone Therapy<br>(No vs Yes) | 0.98 (0.89-1.09) | 0.75    | 0.93 (0.83-1.04)   | 0.19    |

HR = hazard ratio; CI = confidence intervals
